# Supplementary material for: Three dominant awnless genes in common wheat: Fine mapping, interaction and contribution to diversity in awn shape and length
Source: PubMed Central journal article supplement (PMC5402986; doi:10.1371/journal.pone.0176148), 2017-04-24
Supplement: pone.0176148.s002.pdf [file pone.0176148.s002.pdf]

```

OsDL  ----MDLVSPSEHLCYVRCTYCNTVLA--VGVPCCKRLMDTVTVKCGHCNNLSFLSPRPP-MVQPLSPTD--
BdDL  MQQSSMDLVSPSEHLCYVRCTYCNTVLA--VGVPCCKRLMDTVTVKCGHCNNLSFLSPRPPPMVQPLSPNDHH
TaeDL-B  MQ--SMDLVSPSEHLCYVRCTYCNTVLA--VGVPCCKRLMDTVTVKCGHCNNLSFLSPRPPPMVQPLSPNDHH
TaeDL-A  MQ--SMDLVSPSEHLCYVRCTYCNTVLA--VGVPCCKRLMDTVTVKCGHCNNLSFLSPRPPPMVQPLSPNDHH
TaeDL-D  MQ--SMDLVSPSEHLCYVRCTYCNTVLA--VGVPCCKRLMDTVTVKCGHCNNLSFLSPRPPPMVQPLSPNDHH
HvDL  MQ--SMDLVSPSEHLCYVRCTYCNTVLA--VGVPCCKRLMDTVTVKCGHCNNLSFLSPRPPPMVQPLSPNDHH
      *****

```

```

OsDL  HPLGPFQGPCTDCRRNQPLP-LVSPTSNEGSPRAPFVVKPPEKKHRLPSAYNRFMREEIQRIKAAKPDIPHR
BdDL  HPMGPFQG-CTDCRRNQPLPPLASPTSSDASPRAPFVVKPPEKKHRLPSAYNRFMREEIQRIKAAKPDIPHR
TaeDL-B  HPMGPFQG-CTDCRRNQPLPPLASPTSSDASPRAPFVVKPPEKKHRLPSAYNRFMREEIQRIKAAKPDIPHR
TaeDL-A  HPMGPFQG-CTDCRRNQPLPPLASPTSSDASPRAPFVVKPPEKKHRLPSAYNRFMREEIQRIKAAKPDIPHR
TaeDL-D  HPMGPFQG-CTDCRRNQPLPPLASPTSSDASPRAPFVVKPPEKKHRLPSAYNRFMREEIQRIKAAKPDIPHR
HvDL  HPMGPFQG-CTDCRRNQPLPPLASPTSSDASPRAPFVVKPPEKKHRLPSAYNRFMREEIQRIKAAKPDIPHR
      ** ***** * ***** ***** *****

```

```

OsDL  EAFSMAAKNWAKCDPRCSSTVSTSNSEPR-VVAAPIPHQERANEQVVESFDIFKQMERST
BdDL  EAFSMAAKNWAKCDPRCSSTVSTSNSEPR-VVAAPIPHQERANEQVVESFDIFKQMERST
TaeDL-B  EAFSMAAKNWAKCDPRCSSTVSTSNSEPR-IVVPGPQLQERATEQVVESFDIFKQMERST
TaeDL-A  EAFSMAAKNWAKCDPRCSSTVSTSNSEPR-IVVPGPQLQERATEQVVESFDIFKQMERST
TaeDL-D  EAFSMAAKNWAKCDPRCSSTVSTSNSEPR-IVVPGPQLQERATEQVVESFDIFKQMERST
HvDL  EAFSMAAKNWAKCDPRCSSTVSTSNSEPR-IVVPGP--QERATEQVVESFDIFKQMERST
      ***** ** ** * ** ** ** **

```

**S2 Fig. Alignment of DL and related protein sequences.** Orthologs of rice DL (accession: Q76EJ0, OsDL) in *Brachypodium distachyon* (XP\_010228969.1, BdDL), barley (BAK04901.1, HvDL), and the A-genome (306676\_AA1011910.1, TaDL-A), B-genome (321049\_AA1054410.1, TaDL-B) and D-genome of wheat (343031\_AA1127860.1, TaDL-D) were aligned. Conserved amino acid residues are indicated by asterisks and the YABBY domain by the orange bar.
