# Supplementary material for: Three dominant awnless genes in common wheat: Fine mapping, interaction and contribution to diversity in awn shape and length
Source: PubMed Central journal article supplement (PMC5402986; doi:10.1371/journal.pone.0176148), 2017-04-24
Supplement: pone.0176148.s003.pdf [file pone.0176148.s003.pdf]

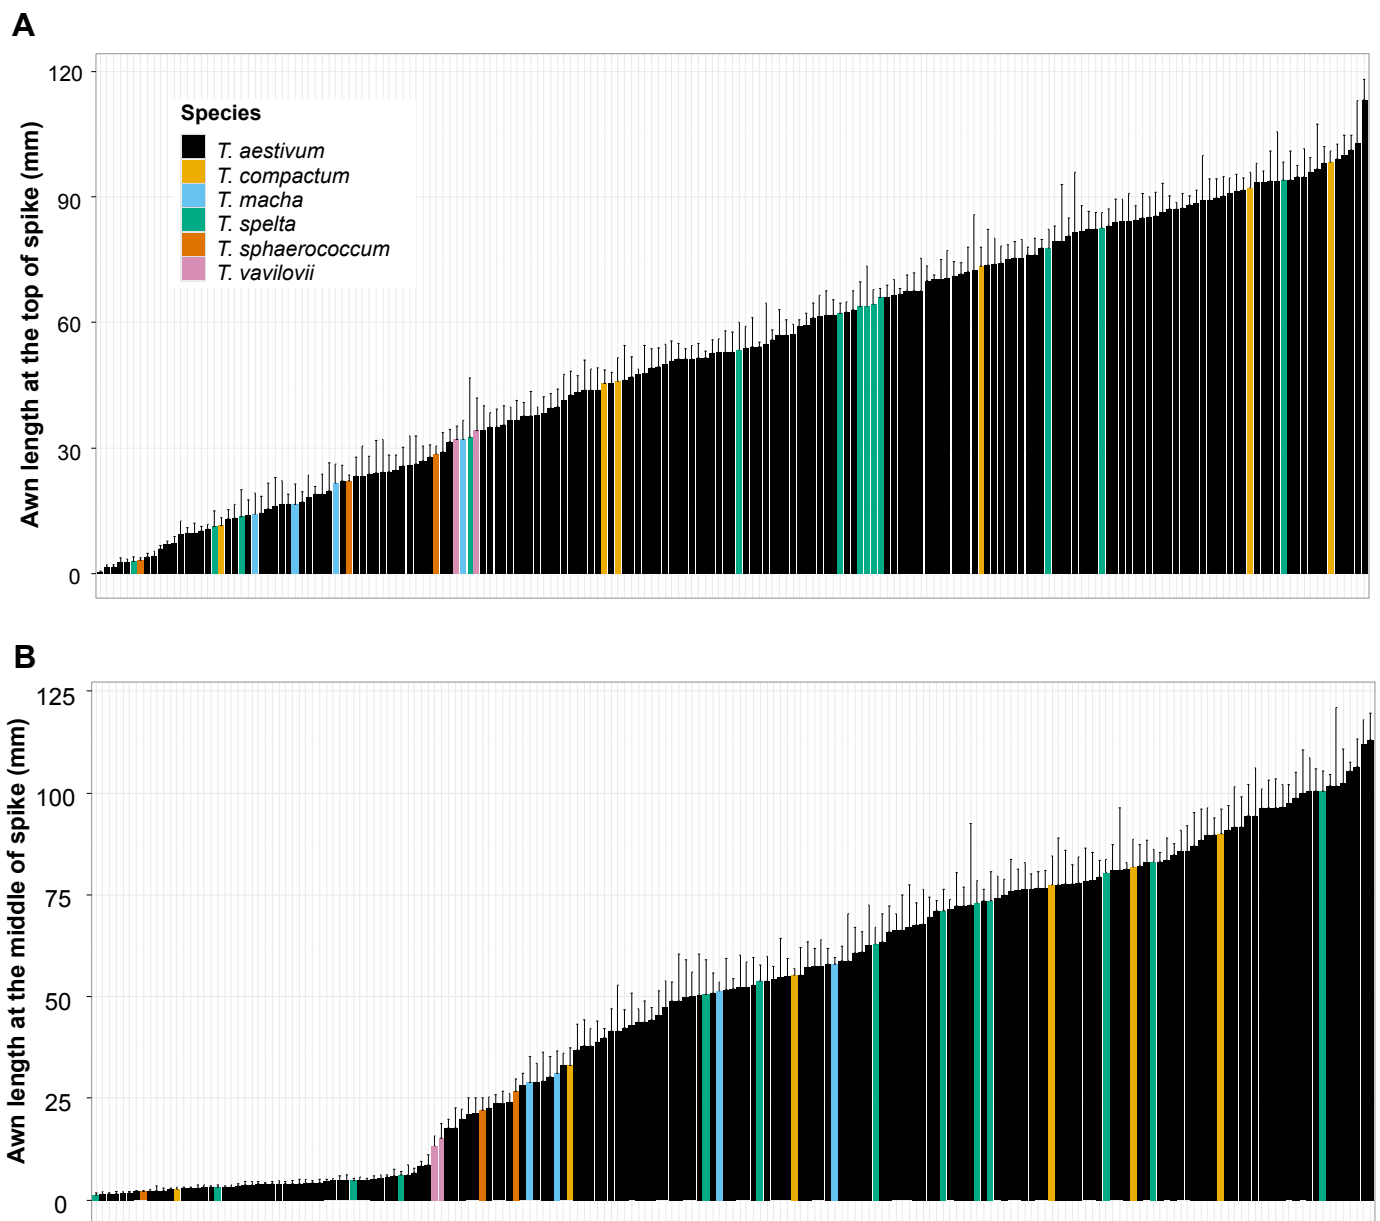

**S3 Fig. Variation in awn length of the 189 hexaploid wheat varieties.** Awn length at the top (A) and middle (B) of the spike in the hexaploid wheat core collection. Subspecies of *T. aestivum* are indicated by different colors. Data are means  $\pm$  SD.
