# Supplementary material for: Three dominant awnless genes in common wheat: Fine mapping, interaction and contribution to diversity in awn shape and length
Source: PubMed Central journal article supplement (PMC5402986; doi:10.1371/journal.pone.0176148), 2017-04-24
Supplement: pone.0176148.s005.pdf [file pone.0176148.s005.pdf]

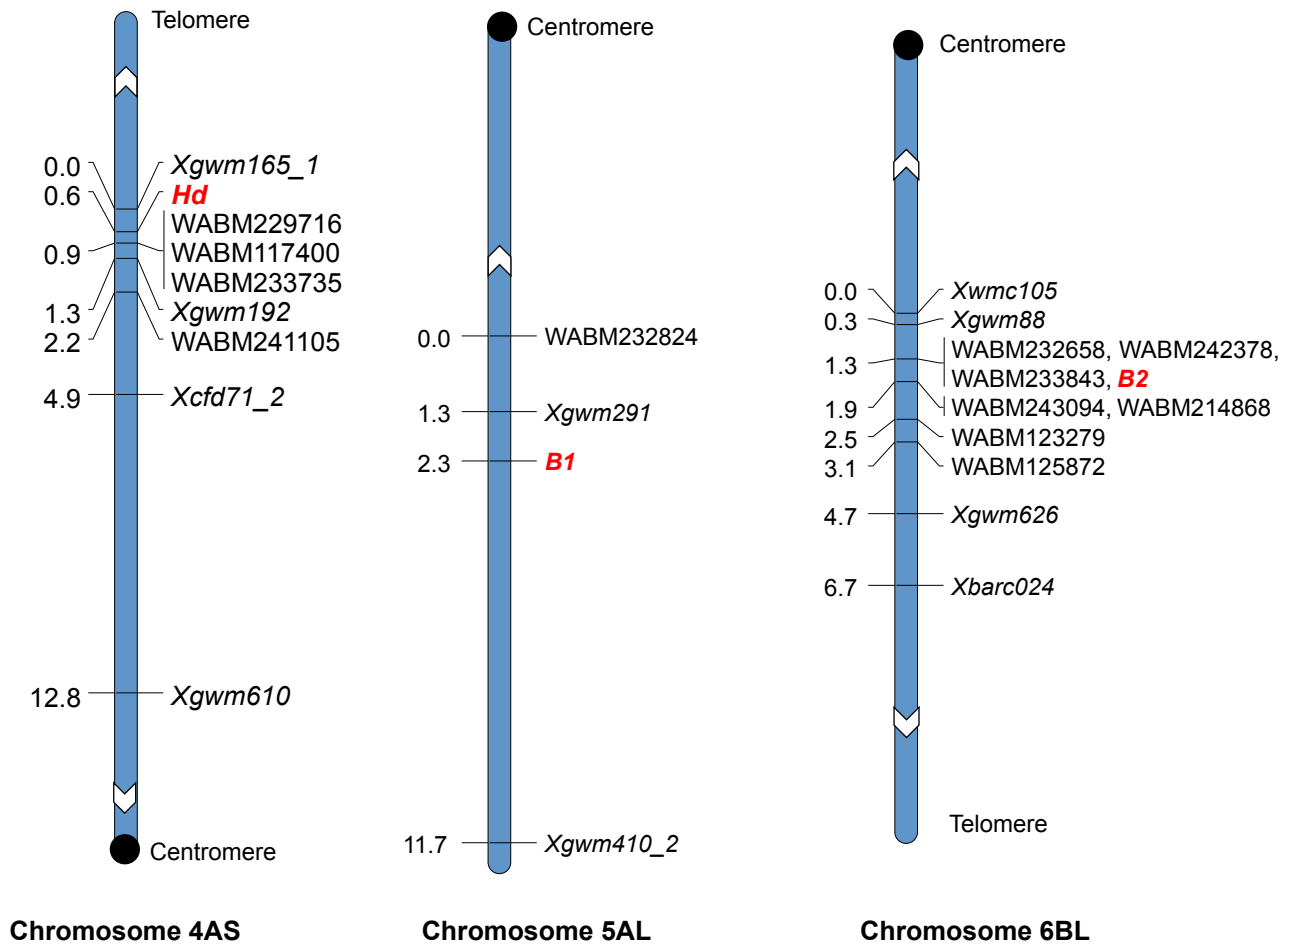

**S5 Fig. Linkage map constructed using PCR-based markers.** The linkage map was constructed using 161 RILs with known genotypes at the *Hd*, *B1* and *B2* loci to confirm the locations of the PCR-based markers developed. SSR markers were also included.
