# Supplementary material for: Three dominant awnless genes in common wheat: Fine mapping, interaction and contribution to diversity in awn shape and length
Source: PubMed Central journal article supplement (PMC5402986; doi:10.1371/journal.pone.0176148), 2017-04-24
Supplement: pone.0176148.s006.pdf [file pone.0176148.s006.pdf]

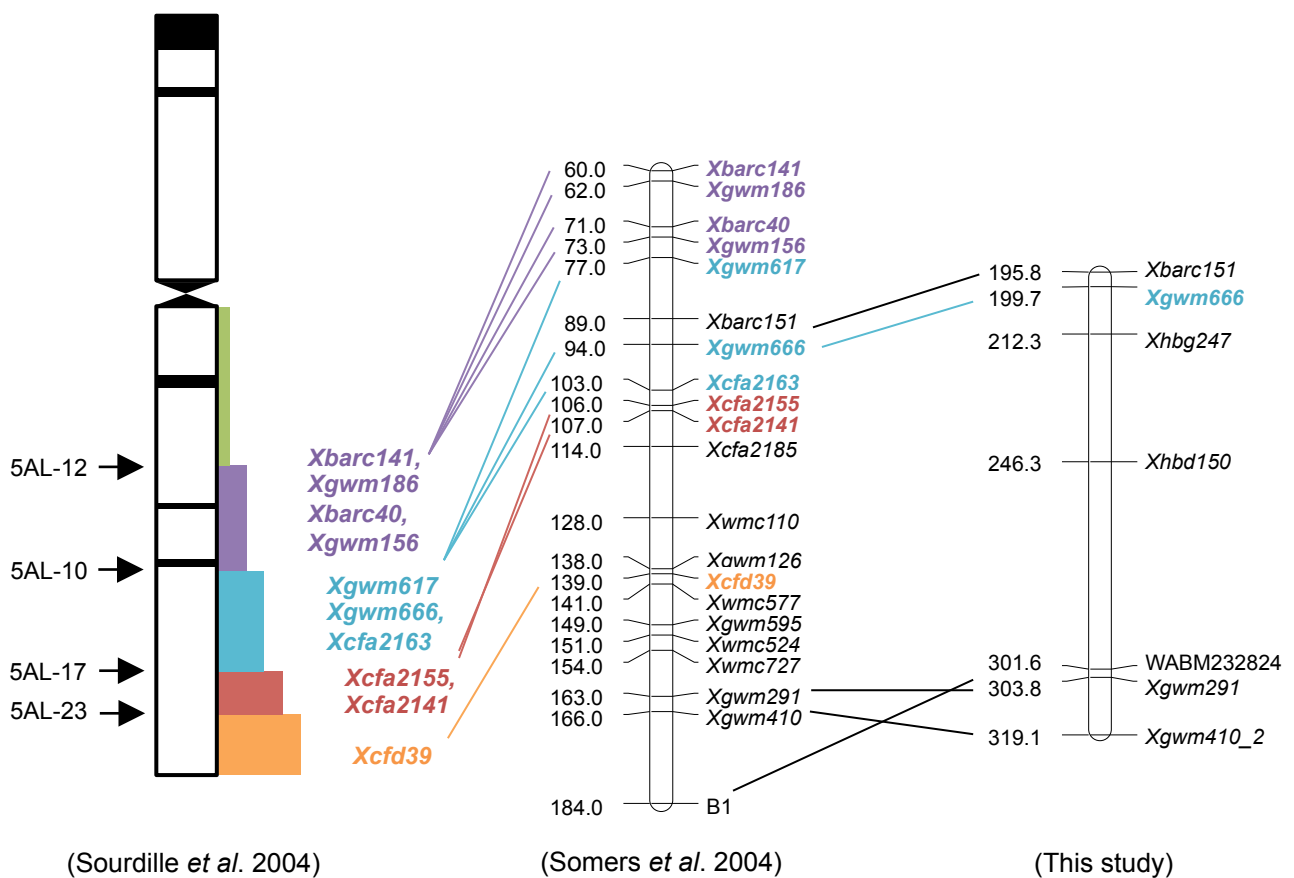

**S6 Fig. Comparative map indicating the location of the *B1* locus.** The physical map of chromosome 5A (left) and genetic maps (middle and right) were compared to locate the *B1* locus on the physical map. Arrows indicate the break point of the chromosome deletion lines obtained by Endo and Gill [45]. SSR markers mapped to the physical map of chromosome 5A were used to locate the *B1* locus.

45. Endo TR, Gill BS. The deletion stocks of common wheat. *J Hered.* 1996; 87: 295–307.
