# Supplementary material for: Three dominant awnless genes in common wheat: Fine mapping, interaction and contribution to diversity in awn shape and length
Source: PubMed Central journal article supplement (PMC5402986; doi:10.1371/journal.pone.0176148), 2017-04-24
Supplement: pone.0176148.s008.pdf [file pone.0176148.s008.pdf]

**S2 Table.** Primers used in this study

| Primer name     | Sequence (5' -> 3')                                      | Restriction enzyme | Chromosome |
|-----------------|----------------------------------------------------------|--------------------|------------|
| WABM233735PCR   | ATCTCGTGACCCAGTACCT<br>GCTGGAACCGGCAAAATCAG              | <i>Pst</i> I       | 4A         |
| WABM241105PCR   | TGGCCAAGCTTTCACCTCCA<br>GTGGAAGTAACGCGGGAAGA             | <i>Pst</i> I       | 4A         |
| WABM229716PCR   | GACGATTTGCTTTCCCGTC<br>ACCATAAAAAGAAGGAAAAGGCT           | -<br>(SSR)         | 4A         |
| WABM117400PCR   | AAAGGTCGGAGGTGACAAGC<br>GCGACTAACCGGGAATAA               | -<br>(SSR)         | 4A         |
| <i>Xgwm192*</i> | GGTTTTCTTTCAGATTGCGC<br>CGTTGTCTAATCTTGCCTTGC            | -<br>(SSR)         | 4A         |
| WABM232824PCR   | ACAAGCTCAAGCTGGTCCAT<br>TGGCACAGGTGCTATTGGTA             | -<br>(Indel)       | 5A         |
| <i>Xgwm291*</i> | CATCCCTACGCCACTCTGC<br>AATGGTATCTATTCCGACCCG             | -<br>(SSR)         | 5A         |
| WABM232658PCR   | AAGTTCGCCTTTCACCAGT<br>TCTGCCCTACATCTGTTGC               | -<br>(Indel)       | 6B         |
| WABM242378PCR   | GTAGATATATGGCATGCAAAAGCCA<br>TTCAGATTGAATATTAGTACGCTGAAA | <i>Pst</i> I       | 6B         |
| WABM233843PCR   | AAAGTTCACGACAGCGGAGT<br>AACGAGAAGATGACCCAGC              | <i>Pst</i> I       | 6B         |
| WABM243094PCR   | ACCACAGAAAAACGCATGCC<br>TGGGTAGTCTTTTGCTGCCT             | <i>Bst</i> PI      | 6B         |
| WABM214868PCR   | GGGTGCCTGAACATTGATGC<br>CCCCAAGTGCTGTCGTGTAT             | -<br>(SSR)         | 6B         |
| WABM125872PCR   | ACTTAGTCAACATGCCCCACA<br>ACCTCACTGCGACATTGCT             | -                  | 6B         |
| WABM123279PCR   | CTCAAGCTGGTGGCAAGAGA<br>GACTTTGTTTGGACGCCACC             | -<br>(Indel)       | 6B         |

\*These two SSR markers have been previously described (<http://wheat.pw.usda.gov/GG3/>).
