# Supplementary material for: Three dominant awnless genes in common wheat: Fine mapping, interaction and contribution to diversity in awn shape and length
Source: PubMed Central journal article supplement (PMC5402986; doi:10.1371/journal.pone.0176148), 2017-04-24
Supplement: pone.0176148.s010.pdf [file pone.0176148.s010.pdf]

**S4 Table.** Orthologs of genes involved in awn development in wheat

| Gene           | Locus               | Orthologs in wheat                     | Similarity (%) |
|----------------|---------------------|----------------------------------------|----------------|
| <i>Lks2</i>    | MLOC_74469<br>(7HL) | TRIAE_CS42_7AL_TGACv1_557584_AA1783580 | 98.6           |
|                |                     | TRIAE_CS42_7BL_TGACv1_577937_AA1886410 | 97.4           |
|                |                     | TRIAE_CS42_7DL_TGACv1_602657_AA1964260 | 98.6           |
| <i>LABA1</i>   | Os04g0518800        | TRIAE_CS42_2AL_TGACv1_094044_AA0291560 | 78.9           |
|                |                     | TRIAE_CS42_2BL_TGACv1_129499_AA0386210 | 80.1           |
|                |                     | TRIAE_CS42_2DL_TGACv1_158365_AA0516710 | 78.5           |
| <i>DL</i>      | Os03g0215200        | TRIAE_CS42_4AS_TGACv1_306676_AA1011910 | 89.0           |
|                |                     | TRIAE_CS42_4BL_TGACv1_321049_AA1054410 | 88.4           |
|                |                     | TRIAE_CS42_4DL_TGACv1_343031_AA1127860 | 88.5           |
| <i>OsETT2</i>  | Os01g0670800        | TRIAE_CS42_3AL_TGACv1_195685_AA0652720 | 75.1           |
|                |                     | TRIAE_CS42_3B_TGACv1_221306_AA0736770  | 75.0           |
|                |                     | TRIAE_CS42_3DL_TGACv1_251881_AA0885700 | 75.6           |
| <i>SHL2</i>    | Os01g0527600        | TRIAE_CS42_3B_TGACv1_223814_AA0787720  | 76.6           |
|                |                     | TRIAE_CS42_3DL_TGACv1_249614_AA0852540 | 77.2           |
| <i>RAE2</i>    | Os08g0485500        | TRIAE_CS42_6AL_TGACv1_471646_AA1512300 | 65.0           |
|                |                     | TRIAE_CS42_6BL_TGACv1_499434_AA1582500 | 51.4           |
|                |                     | TRIAE_CS42_6DL_TGACv1_527458_AA1704280 | 51.4           |
| <i>An-1</i>    | Os04g0350700        | TRIAE_CS42_2AL_TGACv1_093921_AA0289390 | 54.5           |
|                |                     | TRIAE_CS42_2BL_TGACv1_129357_AA0380060 | 52.2           |
|                |                     | TRIAE_CS42_2DL_TGACv1_160046_AA0545980 | 53.3           |
| <i>HvKnox3</i> | CAA58503.1          | TRIAE_CS42_4AL_TGACv1_291876_AA0996890 | 97.0           |
|                |                     | TRIAE_CS42_4BS_TGACv1_328386_AA1087310 | 97.5           |
|                |                     | TRIAE_CS42_4DS_TGACv1_361480_AA1168780 | 97.3           |

A BlastP search was performed against the EnsemblPlants *Triticum aestivum* protein database.
